# Supplementary material for: An Exact Performance Evaluation for the Supplier in a Two-Echelon Inventory System
Source: Atypon-hosted journal article supplement (doi:10.1287/opre.48.4.646.12421), 2000-08-01
Supplement: opre.48.4.646-sm.pdf [file opre.48.4.646-sm.pdf]

## Appendix

Proof of Proposition 3:

We first prove that  $U_{i0}$  divides  $d_i$ . By definition,  $U_{i0}(t) = (jm_i \bmod m_0)$  for some non-negative integer  $j$ . We may write  $jm_i = km_0 + U_{i0}(t)$  for some non-negative integers  $j, k$ .

Since  $d_i = g.c.d.(m_i, m_0)$ ,  $U_{i0}(t)$  divides  $d_i$ . Taking the limit  $j \rightarrow \infty$  as  $t \rightarrow \infty$ ,  $U_{i0}$  divides  $d_i$ .

Next we will prove that  $U_{i0} \sim U [0, d_i, 2d_i, \dots, m_0 - d_i]$ . The arguments are based on the renewal approach and the i.i.d. interarrival times of demands. By definition  $U_{i0}(0) = 0$ .

$U_{i0}(\cdot)$  is renewed whenever  $U_{i0}(t)$  reaches 0 for any  $t \geq 0$ . Equivalently,  $U_{i0}(\cdot)$  is renewed whenever the demand from retailer  $i$  (in terms of the number of batches of size  $Q$ ) reaches  $g = l.c.m.(m_i, m_0) = m_0 m_i / d_i$ .

Since retailer  $i$  orders  $m_i$  of  $Q$ 's per each replenishment order, this implies there are altogether  $g/m_i = m_0/d_i$  states for all  $U_{i0}(t)$ . We claim that these  $m_0/d_i$  states have to be  $[0, d_i, 2d_i, \dots, m_0 - d_i]$ .

First, from above,  $U_{i0}$  divides  $d_i$ . Thus  $U_{i0}$  is always a multiple of  $d_i$ . Second, if  $[0, d_i, 2d_i, \dots, m_0 - d_i]$  are not all the states, then according to the total number of  $m_0/d_i$  states for  $U_{i0}(t)$ , there exists at least one state within  $[0, d_i, 2d_i, \dots, m_0 - d_i]$  that is reached at least twice before  $U_{i0}(\cdot)$  is renewed.

However, this implies  $U_{i0}(\cdot)$  will be renewed before demand reaches  $gQ$ , and contradicts the definition of  $g$  as the *l.c.m.* Hence  $U_{i0}(t)$  is distributed over  $[0, d_i, 2d_i, \dots, m_0 - d_i]$  for all  $t \geq 0$ .

The proposition follows immediately by noting that interarrival times of demands from retailer  $i$  to the supplier are i.i.d.

QED

Proof of Proposition 5:

By Proposition 2 and Corollary 4.1, Proposition 5 holds if any of  $m_i$  and  $m_j$  is relatively prime with  $m_0$ . We shall prove that Proposition 5 is true even when this does not hold. Let  $d_i = g.c.d.(m_i, m_0)$  and  $d_j = g.c.d.(m_j, m_0)$ . We have  $d_i > 1$  and  $d_j > 1$ . Let  $g = l.c.m.(d_i, d_j)$ . Since  $m_i$  and  $m_j$  are relatively prime,  $g = d_i d_j$  and  $d_i \perp d_j$ .

We shall prove that the proposition is true both when (i)  $m_0 = g$  and (ii)  $m_0 \neq g$ .

(i) We first prove that  $(D_{i_0} + D_{j_0}) \bmod g \sim U [0, 1, 2, \dots, g - 1]$ . The approach is similar to the proof of Proposition 3. For simplicity, rewrite  $(D_{i_0} \bmod g)$  as  $X$  and  $(D_{j_0} \bmod g)$  as  $Y$ . By Proposition 1, it is equivalent to prove that  $(X + Y) \bmod g \sim U [0, 1, 2, \dots, g - 1]$ .

From Proposition 3,  $X \sim U [0, d_i, 2d_i, \dots, g - d_i]$ . Similarly  $Y \sim U [0, d_j, 2d_j, \dots, g - d_j]$ .

Let  $(X_1, Y_1) = (a_1 d_i, a_2 d_j)$  and  $(X_2, Y_2) = (b_1 d_i, b_2 d_j)$  be any two different feasible combinations for  $(X, Y)$  where  $a_1, b_1 \in [0, 1, 2, \dots, (g - d_i)/d_i]$ , and  $a_2, b_2 \in [0, 1, 2, \dots, (g - d_j)/d_j]$ .

We claim that  $(X_1 + Y_1) \bmod g \neq (X_2 + Y_2) \bmod g$ . Suppose this is not true; then algebraically it can be shown that the fact that  $g = l.c.m.(d_i, d_j)$  is contradicted (the proof is available from the authors).

Now recall there are altogether  $d_i d_j = g$  combinations of  $(X, Y)$  and each has a different value for  $(X + Y) \bmod g$ . Also,  $0 \leq (X + Y) \bmod g < g$ . So the values should be  $[0, 1, 2, \dots, g - 1]$ .

Furthermore,  $(X + Y) \bmod g$  should be uniformly distributed over this set since both of  $X$  and  $Y$  are uniformly distributed. We conclude  $(D_{i_0} + D_{j_0}) \bmod g \sim U [0, 1, 2, \dots, g - 1]$ .

The proof is complete if  $m_0 = d_i d_j = g$ .

(ii) If  $m_0 \neq g$ , then there exists an integer  $k > 1$  such that  $m_0 = k d_i d_j$ , since  $m_0$  divides both

$d_i$  and  $d_j$ , and  $d_i \perp d_j$ . From Proposition 3,  $D_{i_0} \bmod m_0 \sim U [0, d_i, 2d_i, \dots, m_0 - d_i]$  and  $D_{j_0} \bmod m_0 \sim U [0, d_j, 2d_j, \dots, m_0 - d_j]$ , which can be rewritten as  $D_{i_0} \bmod m_0 \sim \{U [0, g, 2g, \dots, (k - 1)g] + U [0, d_i, 2d_i, \dots, g - d_i]\}$  and  $D_{j_0} \bmod m_0 \sim \{U [0, g, 2g, \dots, (k - 1)g] + U [0, d_j, 2d_j, \dots, g - d_j]\}$ . In other words,  $D_{i_0} \bmod m_0 = ((D_{i_0} \bmod m_0) \div g)g + (D_{i_0} \bmod g)$ .

Similarly,  $D_{j_0} \bmod m_0 = ((D_{j_0} \bmod m_0) \operatorname{div} g)g + (D_{j_0} \bmod g)$ . We write  $(D_{i_0} + D_{j_0}) \bmod m_0 =$   
 $((D_{i_0} \bmod m_0) \operatorname{div} g)g + ((D_{j_0} \bmod m_0) \operatorname{div} g)g + (((D_{i_0} \bmod g) + (D_{j_0} \bmod g)) \operatorname{div} g)g +$   
 $((D_{i_0} \bmod g) + (D_{j_0} \bmod g)) \bmod g \bmod m_0$ .

From above,  $((D_{i_0} \bmod m_0) \operatorname{div} g)g \bmod m_0 \sim U [0, g, 2g, \dots, (\quad - 1)g]$ . Hence by Proposition 2,  $((D_{i_0} \bmod m_0) \operatorname{div} g)g + ((D_{j_0} \bmod m_0) \operatorname{div} g)g + (((D_{i_0} \bmod g) + (D_{j_0} \bmod g)) \operatorname{div} g)g \bmod m_0 \sim U [0, g, 2g, \dots, (\quad - 1)g]$ . We also proved  $((D_{i_0} \bmod g) + (D_{j_0} \bmod g)) \bmod g \sim U [0, 1, 2, \dots, g - 1]$ , which implies  $((D_{i_0} \bmod g) + (D_{j_0} \bmod g)) \bmod g \bmod m_0 \sim U [0, 1, 2, \dots, g - 1]$ . Hence, from Proposition 1,  $(D_{i_0} + D_{j_0}) \bmod m_0 \sim \{U [0, g, 2g, \dots, (\quad - 1)g] + U [0, 1, 2, \dots, g - 1]\} \bmod m_0$ . We conclude that  $(D_{i_0} + D_{j_0}) \bmod m_0 \sim U [0, 1, 2, \dots, g - 1]$ . QED

Proof of Proposition 6:

Recall  $U_i(t) = D_i(0, t) \bmod Q_i$ . It is well known that  $U_i \sim U [0, 1, \dots, Q_i - 1]$ . From Proposition 3,  $U_{i_0} \sim U [0, d_i, \dots, m_0 - d_i]$  where  $d_i = \operatorname{g.c.d.}(m_i, m_0)$ .

We shall prove that the stationary distribution  $P\{U_{i_0} = a_1, U_i = a_2\} = d_i/m_0 Q_i$  holds for all  $a_1 \in [0, d_i, \dots, m_0 - d_i]$  and  $a_2 \in [0, 1, \dots, Q_i - 1]$ . Independence between  $U_{i_0}$  and  $U_i$  will then be implied. Let  $P\{U_{i_0}(t) = a_1, U_i(t) = a_2\} = d_i/m_0 Q_i$ . Consider a time  $t_1 > t$ ; we want to determine  $P\{U_{i_0}(t_1) = b_1, U_i(t_1) = b_2\}$  for any  $b_1 \in [0, d_i, \dots, m_0 - d_i]$  and  $b_2 \in [0, 1, \dots, Q_i - 1]$ . Let  $D_i(t, t_1) = \dots$ ;  $(U_{i_0}(t_1) = b_1, U_i(t_1) = b_2 \mid D_i(t, t_1) = \dots)$  holds if and only if  $U_{i_0}(t) = a_1$  and  $U_i(t) = a_2$ , where the values of  $a_1$  and  $a_2$  will be specified below.

Because  $U_i(t_1) = (U_i(t) + D_i(t, t_1)) \bmod Q_i$ ,  $b_2 = (a_2 + \dots) \bmod Q_i$ . Since  $0 \leq a_2 < Q_i$ ,  $a_2 = c_2 Q_i + b_2 - \dots$ , where  $c_2$  is the smallest (and the only) non-negative integer such that  $0 \leq a_2 < Q_i$ .

Also,  $U_{i_0}(t_1) = (U_{i_0}(t) + ((U_i(t) + D_i(t, t_1)) \operatorname{div} Q_i)m_i) \bmod m_0$ . So  $b_1 = (a_1 + ((c_2 Q_i + b_2 - \dots) + \dots))$

$\text{div } Q_i)m_i) \bmod m_0 = (a_1 + c_2m_i) \bmod m_0$ . Since  $0 \leq a_1 < m_0$ ,  $a_1 = c_1m_0 + b_1 - c_2m_i$  where  $c_1$  is the smallest (and the only) non-negative integer such that  $0 \leq a_1 < m_0$ . In addition,  $a_1 \in [0, d_i, \dots, m_0 - d_i]$  since  $a_1 = c_1m_0 + b_1 - c_2m_i$  in which  $c_1m_0, b_1$  and  $c_2m_i$  all divides  $d_i$ .

The values of  $a_1$  and  $a_2$  are thus available. Hence,  $P\{U_{i0}(t_1) = b_1, U_i(t_1) = b_2 \mid D_i(t, t_1) = \dots\} = P\{U_{i0}(t) = a_1, U_i(t) = a_2\} = d_i/m_0Q_i$ . By summing up all the probabilities of  $P\{D_i(t, t_1) = \dots\}$ , the proof is complete.

QED

Table 1: Parameter values for 46 test problems ( $m_0 = 4$  for cases 1-23,  $m_0 = 8$  for parallel cases 24-46)

| Case | $N$ | 1 | 2 | 3 | 4 | $Q_1$ | $Q_2$ | $Q_3$ | $Q_4$ | $\frac{N}{\sum_{i=1}^N 1/Q_i}$ |
|------|-----|---|---|---|---|-------|-------|-------|-------|--------------------------------|
| 1    | 2   | 2 | 4 | - | - | 4     | 8     | -     | -     | 1                              |
| 2    | 2   | 2 | 6 | - | - | 4     | 12    | -     | -     | 1                              |
| 3    | 2   | 4 | 6 | - | - | 8     | 12    | -     | -     | 1                              |
| 4    | 4   | 1 | 1 | 2 | 2 | 4     | 4     | 8     | 8     | 1                              |
| 5    | 4   | 1 | 1 | 3 | 3 | 4     | 4     | 12    | 12    | 1                              |
| 6    | 4   | 2 | 2 | 3 | 3 | 8     | 8     | 12    | 12    | 1                              |
| 7    | 2   | 4 | 8 | - | - | 4     | 8     | -     | -     | 1                              |
| 8    | 4   | 2 | 2 | 4 | 4 | 4     | 4     | 8     | 8     | 2                              |
| 9    | 4   | 2 | 2 | 6 | 6 | 4     | 4     | 12    | 12    | 2                              |
| 10   | 4   | 4 | 4 | 6 | 6 | 8     | 8     | 12    | 12    | 2                              |
| 11   | 8   | 1 | 1 | 2 | 2 | 4     | 4     | 8     | 8     | 2                              |
| 12   | 8   | 1 | 1 | 3 | 3 | 4     | 4     | 12    | 12    | 2                              |
| 13   | 8   | 2 | 2 | 3 | 3 | 8     | 8     | 12    | 12    | 2                              |
| 14   | 2   | 8 | 8 | - | - | 4     | 4     | -     | -     | 4                              |
| 15   | 4   | 4 | 4 | 8 | 8 | 4     | 4     | 8     | 8     | 4                              |
| 16   | 4   | 8 | 4 | 4 | 4 | 4     | 4     | 8     | 8     | 4                              |
| 17   | 4   | 8 | 4 | 6 | 6 | 4     | 4     | 12    | 12    | 4                              |
| 18   | 8   | 2 | 2 | 4 | 4 | 4     | 4     | 8     | 8     | 4                              |
| 19   | 8   | 2 | 2 | 6 | 6 | 4     | 4     | 12    | 12    | 4                              |
| 20   | 8   | 4 | 4 | 6 | 6 | 8     | 8     | 12    | 12    | 4                              |
| 21   | 8   | 4 | 4 | 8 | 8 | 4     | 4     | 8     | 8     | 8                              |
| 22   | 8   | 8 | 4 | 4 | 4 | 4     | 4     | 8     | 8     | 8                              |
| 23   | 8   | 8 | 4 | 6 | 6 | 4     | 4     | 12    | 12    | 8                              |

Note: When  $N = 8$ , retailers 5-8 are identical to retailers 1-4 respectively.

Table 2: Exact and approximate solutions for expected backorders  $E(B_0)$  when  $m_0 = 4$  and  $Q = 4$

|               |         | $E(B_0)$ Values |        |        |        |        |        |
|---------------|---------|-----------------|--------|--------|--------|--------|--------|
| Case:         | $S_0$ : | 0               | $2Q$   | $4Q$   | $6Q$   | $8Q$   | $10Q$  |
| 1             |         | 2.5000          | 0.8182 | 0.0683 | 0.0000 | 0.0000 | 0.0000 |
| 2             |         | 2.5000          | 0.8175 | 0.0675 | 0.0000 | 0.0000 | 0.0000 |
| 3             |         | 2.5000          | 0.8139 | 0.0639 | 0.0000 | 0.0000 | 0.0000 |
| 4             |         | 2.5000          | 0.8432 | 0.0943 | 0.0011 | 0.0000 | 0.0000 |
| 5             |         | 2.5000          | 0.8432 | 0.0943 | 0.0011 | 0.0000 | 0.0000 |
| 6             |         | 2.5000          | 0.8428 | 0.0938 | 0.0010 | 0.0000 | 0.0000 |
| Poisson       |         |                 |        |        |        |        |        |
| Approximation |         | 2.5000          | 0.8679 | 0.1248 | 0.0071 | 0.0002 | 0.0000 |
| 7             |         | 3.5000          | 1.5773 | 0.3361 | 0.0088 | 0.0000 | 0.0000 |
| 8             |         | 3.5000          | 1.6152 | 0.3865 | 0.0214 | 0.0000 | 0.0000 |
| 9             |         | 3.5000          | 1.6144 | 0.3850 | 0.0206 | 0.0000 | 0.0000 |
| 10            |         | 3.5000          | 1.6107 | 0.3777 | 0.0170 | 0.0000 | 0.0000 |
| 11            |         | 3.5000          | 1.6423 | 0.4373 | 0.0463 | 0.0013 | 0.0000 |
| 12            |         | 3.5000          | 1.6423 | 0.4373 | 0.0463 | 0.0013 | 0.0000 |
| 13            |         | 3.5000          | 1.6418 | 0.4363 | 0.0457 | 0.0013 | 0.0000 |
| Poisson       |         |                 |        |        |        |        |        |
| Approximation |         | 3.5000          | 1.6692 | 0.4925 | 0.0804 | 0.0075 | 0.0004 |
| 14            |         | 5.5000          | 3.5020 | 1.6318 | 0.4116 | 0.0322 | 0.0005 |
| 15            |         | 5.5000          | 3.5037 | 1.6390 | 0.4180 | 0.0331 | 0.0005 |
| 16            |         | 5.5000          | 3.5046 | 1.6558 | 0.4422 | 0.0418 | 0.0008 |
| 17            |         | 5.5000          | 3.5045 | 1.6550 | 0.4408 | 0.0411 | 0.0007 |
| 18            |         | 5.5000          | 3.5122 | 1.7049 | 0.5083 | 0.0681 | 0.0025 |
| 19            |         | 5.5000          | 3.5120 | 1.7034 | 0.5057 | 0.0666 | 0.0023 |
| 20            |         | 5.5000          | 3.5111 | 1.6961 | 0.4930 | 0.0593 | 0.0013 |
| Poisson       |         |                 |        |        |        |        |        |
| Approximation |         | 5.5000          | 3.5321 | 1.8144 | 0.6838 | 0.1810 | 0.0337 |
| 21            |         | 9.5000          | 7.5000 | 5.5008 | 3.5253 | 1.7491 | 0.5622 |
| 22            |         | 9.5000          | 7.5000 | 5.5012 | 3.5326 | 1.7792 | 0.6024 |
| 23            |         | 9.5000          | 7.5000 | 5.5012 | 3.5322 | 1.7777 | 0.6002 |
| Poisson       |         |                 |        |        |        |        |        |
| Approximation |         | 9.5000          | 7.5009 | 5.5201 | 3.6465 | 2.0725 | 0.9789 |

Table 3: Exact and approximate solutions for expected backorders  $E(B_0)$  when  $m_0 = 8$  and

$Q = 4$

|                          |         | $E(B_0)$ Values |        |        |        |        |       |
|--------------------------|---------|-----------------|--------|--------|--------|--------|-------|
| Case:                    | $S_0$ : | 0               | $2Q$   | $4Q$   | $6Q$   | $8Q$   | $10Q$ |
| 1                        | 4.5000  | 2.6591          | 1.2841 | 0.4091 | 0.0341 | 0.0000 |       |
| 2                        | 4.5000  | 2.6588          | 1.2838 | 0.4088 | 0.0338 | 0.0000 |       |
| 3                        | 4.5000  | 2.6569          | 1.2819 | 0.4069 | 0.0319 | 0.0000 |       |
| 4                        | 4.5000  | 2.6716          | 1.2972 | 0.4222 | 0.0472 | 0.0005 |       |
| 5                        | 4.5000  | 2.6716          | 1.2971 | 0.4221 | 0.0471 | 0.0005 |       |
| 6                        | 4.5000  | 2.6714          | 1.2969 | 0.4219 | 0.0469 | 0.0005 |       |
| Poisson<br>Approximation | 4.5000  | 2.6839          | 1.3124 | 0.4375 | 0.0625 | 0.0036 |       |
| 7                        | 5.5000  | 3.5386          | 1.9180 | 0.7930 | 0.1680 | 0.0044 |       |
| 8                        | 5.5000  | 3.5576          | 1.9432 | 0.8183 | 0.1933 | 0.0107 |       |
| 9                        | 5.5000  | 3.5572          | 1.9425 | 0.8175 | 0.1925 | 0.0103 |       |
| 10                       | 5.5000  | 3.5554          | 1.9389 | 0.8139 | 0.1886 | 0.0085 |       |
| 11                       | 5.5000  | 3.5712          | 1.9686 | 0.8443 | 0.2193 | 0.0231 |       |
| 12                       | 5.5000  | 3.5712          | 1.9686 | 0.8443 | 0.2193 | 0.0231 |       |
| 13                       | 5.5000  | 3.5709          | 1.9681 | 0.8438 | 0.2188 | 0.0228 |       |
| Poisson<br>Approximation | 5.5000  | 3.5846          | 1.9962 | 0.8748 | 0.2500 | 0.0404 |       |
| 14                       | 7.5000  | 5.5010          | 3.5659 | 1.9568 | 0.8320 | 0.2060 |       |
| 15                       | 7.5000  | 5.5018          | 3.5695 | 1.9608 | 0.8361 | 0.2092 |       |
| 16                       | 7.5000  | 5.5023          | 3.5779 | 1.9734 | 0.8488 | 0.2215 |       |
| 17                       | 7.5000  | 5.5023          | 3.5775 | 1.9727 | 0.8481 | 0.2208 |       |
| 18                       | 7.5000  | 5.5061          | 3.6025 | 2.0103 | 0.8865 | 0.2554 |       |
| 19                       | 7.5000  | 5.5060          | 3.6017 | 2.0089 | 0.8850 | 0.2540 |       |
| 20                       | 7.5000  | 5.5055          | 3.5980 | 2.0020 | 0.8777 | 0.2472 |       |
| Poisson<br>Approximation | 7.5000  | 5.5160          | 3.6572 | 2.1079 | 0.9977 | 0.3587 |       |
| 21                       | 11.500  | 9.5000          | 7.5004 | 5.5126 | 3.6250 | 2.0438 |       |
| 22                       | 11.500  | 9.5000          | 7.5006 | 5.5163 | 3.6402 | 2.0675 |       |
| 23                       | 11.500  | 9.5000          | 7.5006 | 5.5161 | 3.6394 | 2.0662 |       |
| Poisson<br>Approximation | 11.500  | 9.5005          | 7.5100 | 5.5737 | 3.7963 | 2.3127 |       |

Table 4: Cost performance of the Poisson approximation when  $K = 1$

| Case |     |     |     | Approximate Solution |         |        | Exact Solution |         |        | Comparisons |       |
|------|-----|-----|-----|----------------------|---------|--------|----------------|---------|--------|-------------|-------|
| $N$  | $i$ | $Q$ | $q$ | $S_0/Q$              | $Q_0/Q$ | $TC_1$ | $S_0/Q$        | $Q_0/Q$ | $TC_2$ | $TC_3$      | (%)   |
| 2    | 4   | 4   | 2   | 4                    | 4       | 2.4774 | 4              | 3       | 2.0361 | 2.0557      | 0.96  |
|      |     |     | 5   | 5                    | 4       | 3.2855 | 4              | 3       | 2.4056 | 2.5543      | 6.18  |
|      |     |     | 10  | 5                    | 3       | 3.8240 | 4              | 2       | 2.7848 | 2.8569      | 2.59  |
| 2    | 4   | 8   | 2   | 2                    | 2       | 1.7073 | 2              | 2       | 1.3876 | 1.3876      | 0.00  |
|      |     |     | 5   | 3                    | 3       | 2.3230 | 2              | 2       | 1.7752 | 1.8501      | 4.22  |
|      |     |     | 10  | 3                    | 2       | 2.6984 | 3              | 2       | 2.0230 | 2.0230      | 0.00  |
| 2    | 8   | 4   | 2   | 7                    | 5       | 3.4920 | 6              | 4       | 2.7347 | 2.7888      | 1.98  |
|      |     |     | 5   | 8                    | 4       | 4.5862 | 7              | 4       | 3.3337 | 3.6933      | 10.79 |
|      |     |     | 10  | 9                    | 4       | 5.3967 | 7              | 3       | 3.8055 | 4.5536      | 19.66 |
| 2    | 8   | 8   | 2   | 4                    | 4       | 2.4774 | 3              | 2       | 1.8916 | 1.9606      | 3.65  |
|      |     |     | 5   | 5                    | 4       | 3.2855 | 4              | 3       | 2.1892 | 2.3919      | 9.26  |
|      |     |     | 10  | 5                    | 3       | 3.8240 | 4              | 2       | 2.6147 | 2.7431      | 4.91  |
| 4    | 4   | 4   | 2   | 7                    | 5       | 3.4920 | 6              | 4       | 2.8413 | 2.8754      | 1.20  |
|      |     |     | 5   | 8                    | 4       | 4.5862 | 7              | 4       | 3.4876 | 3.7659      | 7.98  |
|      |     |     | 10  | 9                    | 4       | 5.3967 | 7              | 3       | 3.9821 | 4.5918      | 15.31 |
| 4    | 4   | 8   | 2   | 4                    | 4       | 2.4774 | 4              | 3       | 2.1188 | 2.1376      | 0.89  |
|      |     |     | 5   | 5                    | 4       | 3.2855 | 4              | 3       | 2.5710 | 2.6783      | 4.17  |
|      |     |     | 10  | 5                    | 3       | 3.8240 | 4              | 2       | 2.8897 | 2.9266      | 1.28  |
| 4    | 8   | 4   | 2   | 12                   | 6       | 4.9769 | 11             | 5       | 3.9358 | 3.9485      | 0.32  |
|      |     |     | 5   | 14                   | 6       | 6.4379 | 12             | 5       | 4.7866 | 5.1972      | 8.58  |
|      |     |     | 10  | 15                   | 6       | 7.5014 | 13             | 5       | 5.4003 | 6.0320      | 11.70 |
| 4    | 8   | 8   | 2   | 7                    | 5       | 3.4920 | 6              | 4       | 2.6640 | 2.7315      | 2.53  |
|      |     |     | 5   | 8                    | 4       | 4.5862 | 7              | 4       | 3.2100 | 3.6356      | 13.26 |
|      |     |     | 10  | 9                    | 4       | 5.3967 | 7              | 3       | 3.6647 | 4.5271      | 23.53 |
| 8    | 4   | 4   | 2   | 12                   | 6       | 4.9769 | 12             | 6       | 4.0769 | 4.9769      | 0.00  |
|      |     |     | 5   | 14                   | 6       | 6.4379 | 13             | 6       | 5.0141 | 5.3129      | 5.96  |
|      |     |     | 10  | 15                   | 6       | 7.5014 | 13             | 5       | 5.6546 | 6.1331      | 8.46  |
| 8    | 4   | 8   | 2   | 7                    | 5       | 3.4920 | 6              | 4       | 2.9868 | 2.9929      | 0.20  |
|      |     |     | 5   | 8                    | 4       | 4.5862 | 7              | 4       | 3.6986 | 3.8650      | 4.50  |
|      |     |     | 10  | 9                    | 4       | 5.3967 | 8              | 4       | 4.1692 | 4.6392      | 11.27 |
| 8    | 8   | 4   | 2   | 22                   | 9       | 7.0218 | 21             | 8       | 5.5593 | 5.6095      | 0.90  |
|      |     |     | 5   | 24                   | 8       | 9.0576 | 22             | 7       | 6.8200 | 7.1681      | 5.13  |
|      |     |     | 10  | 26                   | 8       | 10.547 | 23             | 7       | 7.6865 | 8.7205      | 13.45 |
| 8    | 8   | 8   | 2   | 12                   | 6       | 4.9769 | 11             | 5       | 3.8325 | 3.8612      | 0.75  |
|      |     |     | 5   | 14                   | 6       | 6.4379 | 12             | 5       | 4.6188 | 5.1105      | 10.65 |
|      |     |     | 10  | 15                   | 6       | 7.5014 | 13             | 5       | 5.2097 | 5.9601      | 14.40 |
|      |     |     |     |                      |         |        |                |         |        | mean:       | 6.4%  |

$TC_1$ : Approximate total cost using Poisson approximation for decision values and cost evaluation

$TC_2$ : True optimal total cost

$TC_3$ : True total cost from Poisson approximation decision values

(%):  $[(TC_3 - TC_2) / TC_2]100\%$
